# Supplementary material for: DNAzyme- and light-induced dissipative and gated DNA networks
Source: Royal Society of Chemistry journal article supplement (doi:10.1039/d1sc02091a), 2021-01-01
Supplement: d1sc02091a1.pdf [file d1sc02091a1.pdf]

Supporting Information

**DNAzyme- and Light-Induced-Driven Dissipative and Gated DNA Networks**

Jianbang Wang,<sup>‡a</sup> Zhenzhen Li,<sup>‡a</sup> Zhixin Zhou,<sup>a</sup> Yu Ouyang,<sup>a</sup> Junji Zhang,<sup>b</sup> Xiang Ma,<sup>b</sup> He Tian<sup>b</sup> and Itamar Willner\*<sup>a</sup>

<sup>a</sup> Institute of Chemistry, The Center for Nanoscience and Nanotechnology, The Hebrew University of Jerusalem, Jerusalem 91904, Israel

<sup>b</sup> Key Laboratory for Advanced Materials and Joint International Research Laboratory of Precision Chemistry and Molecular Engineering, Feringa Nobel Prize Scientist Joint Research Center, School of Chemistry and Molecular Engineering, Frontiers Center for Materiobiology and Dynamic Chemistry, East China University of Science and Technology, Shanghai 200237, P. R. China.

\*E-mail: [Itamar.willner@mail.huji.ac.il](mailto:Itamar.willner@mail.huji.ac.il)

<sup>‡</sup>These authors contributed equally to this work.

## Materials and Methods

Oligonucleotides were purchased from Integrated DNA Technologies. The Cy5-, Cy3- and BHQ2-labeled oligonucleotides were purified by high-performance liquid chromatography. All the sequences of the oligonucleotides were listed below. The Pb<sup>2+</sup>-ion-dependent DNAzyme sequence in strand A was underlined and the ribonucleobase cleavage site, rA, in strand T was indicated in bold.

A: 5'-TTGTCTTGACGAAAATCCGAGCCGGTCCGAAAAAAAGGAGCACGCTA-3'

B: 5'-TAGTGTGCTCCCCGTC AAGACAA-3'

C: 5'-Cy5-AGGAGCACGCATCTGTTTGT-3'

D: 5'-GTTGCTGGGTCTTGACGG-BHQ2-3'

T: 5'-CTCCTTTTT**Tr**AGTTTTTCGTC-3'

T<sub>c</sub>: 5'-CTCCTTTTTAGTTTTTCGTC-3'

E: 5'-Cy3-AGGAGCACGCACTGTAGACA-5'

I<sub>1</sub>: 5'-ACAAACAGATGCGTGCTCCT-3'

I<sub>2</sub>: 5'-TGTCTACAGTGCGTGCTCCT-3'

U<sub>1</sub>: 5'-CCATTCAGCGATGTTAGGAGCACGCATCTGTTTGT-3'

U<sub>2</sub>: 5'-GTTGCTGGGTCTTGACGGTAACCCATGTTTAGCT-3'

U<sub>3</sub>: 5'-CTGTTTCAGCGATGTTAGGAGCACGCACTGTAGACA-3'

S<sub>1</sub>: 5'-FAM-AGCTAAT**Tr**AGGAATGG-BHQ1-3'

S<sub>2</sub>: 5'-Cy5-AGCTAAT**Tr**AGGAACAG-BHQ2-3'

F<sub>r</sub>/F<sub>c</sub>: 5'-CC*Azo*CC*Azo*TT*Azo*AC*Azo*CC*Azo*CA*Azo*AAAGGTAGCCTCCTAAGAAAA  
GG-3'

G: 5'-TTTGGGGTAAGGGGTTTGGGGTAAGGGG-3'

H: 5'-CAACAGACATGGGTGAAGGTCAGATTCCATCCAGATGGGGTAAGGGG  
TTTGGG-3'

I: 5'-Cy5-CATCTGGATGGAATCTGACCTTCACCCATGTCTGTTG-3'

J: 5'-TTACCCCAAACCCCTTACCCGTCAAGACCCAGCAACTCCCTC-3'

K: 5'-GAGGGAGTTGCTGGGTCTTGAC-BHQ2-3'

F<sub>n</sub>: 5'-CCCCTTACCCCAAAGGTAGCCTCCTAAGAAAAGG-3'

### **Measurements of the Pb<sup>2+</sup>-ion-dependent DNzyme-driven dissipative processes.**

Strands A and B were mixed with C and D (0.2 μM each one) at 37°C for one hour and then were annealed to 33°C for two hours in 10 mM Tris buffer with 20 mM Mg<sup>2+</sup> and 100 nM Pb<sup>2+</sup> (200 μL, pH 7.4). The samples were measured with  $\lambda_{ex} = 635$  nm and  $\lambda_{em} = 665$  nm at 33°C (calibrated with thermometer). After adding the trigger strand T (0.6, 0.8, 1.0 μM), the measurements were performed for about 2.5 hours.

For the control experiment, the strand T<sub>c</sub> without the ribonucleobase cleavage site was added. For the oscillation process, the trigger T (1 μM) was added at the interval of ca. 2.5 hours. The calibration curve was derived from the measurements of the samples, containing C and D (0.2 μM), with different concentrations of strand B (0, 0.04, 0.08, 0.12, 0.16 and 0.2 μM) to calculate the transient concentrations of the structure B/C+D and C in the samples.

### **Experiments of the inhibitor-gated two dissipative networks.**

The measurements of the gated two dissipative networks were performed with different concentrations of inhibitor I<sub>1</sub> or I<sub>2</sub>, respectively, mixed with the samples composed of 0.2 μM AB, 0.2 μM C, 0.2 μM E and 0.4 μM D in 10 mM Tris buffer with 20 mM Mg<sup>2+</sup> and 100 nM Pb<sup>2+</sup> (200 μL, pH 7.4). After adding the trigger strand T (1.0 μM), the measurements were performed for about 2.5 hours measuring with  $\lambda_{ex1} = 635$  nm,  $\lambda_{em1} = 665$  nm and  $\lambda_{ex2} = 545$  nm,  $\lambda_{em2} = 565$  nm.

### **Measurements of the catalytic reactions of DNAzymes with the inhibitor-gated two dissipative networks.**

For the measurements of DNAzymes catalytic reactions, the samples containing 1  $\mu\text{M}$  AB, 1  $\mu\text{M}$   $U_1$ , 1  $\mu\text{M}$   $U_3$  and 2  $\mu\text{M}$   $U_2$  (10 mM Tris, 20 mM  $\text{Mg}^{2+}$ , 100 nM  $\text{Pb}^{2+}$ , pH 7.4) were prepared with 1  $\mu\text{M}$   $I_1$  or 1  $\mu\text{M}$   $I_2$  or none. The samples were taken out 100  $\mu\text{L}$  at different time intervals after adding the trigger strand T (5  $\mu\text{M}$ ), and were added with 2  $\mu\text{L}$  of the substrate  $S_1/S_2$  (100  $\mu\text{M}$ ) followed with the measurements with  $\lambda_{ex1} = 495$  nm,  $\lambda_{em1} = 518$  nm and  $\lambda_{ex2} = 635$  nm,  $\lambda_{em2} = 665$  nm at 25°C.

### **Measurements of the Light-driven dissipative processes.**

Azobenzene-modified strand  $F_t$  (*trans*-state) (0.8  $\mu\text{M}$ ), G strand (0.4  $\mu\text{M}$ ) were mixed with H, I strands and J, K (0.2  $\mu\text{M}$  each one) in 10 mM Tris buffer with 20 mM  $\text{Mg}^{2+}$  (600  $\mu\text{L}$ , pH 7.4). The samples were stabilized at 55°C for 10 min and then were irradiated with UV light (365 nm, 5 W) for different time (5 and 10 min). The measurements were taken with  $\lambda_{ex} = 635$  nm and  $\lambda_{em} = 665$  nm at 55°C (calibrated with thermometer). During the measurement, the cuvette was sealed with a cap to avoid the evaporation of the sample solution.

For the oscillation processes, the samples (0.8  $\mu\text{M}$   $F_t$ , 0.4  $\mu\text{M}$  G, 0.2  $\mu\text{M}$  HIJK, 600  $\mu\text{L}$ ) were irradiated by UV light (365 nm, 5W) for 10 min every 250 min or 750 min. For one control experiment, the sample (0.8  $\mu\text{M}$   $F_t$ , 0.4  $\mu\text{M}$  G, 0.2  $\mu\text{M}$  HIJK, 600  $\mu\text{L}$ ) was measured at 25°C for 750 min after the UV irradiation (365 nm, 5 W, 10 min at 55°C). For the second control experiment, strand  $F_n$  was used to substitute strand  $F_t$  in the sample (0.8  $\mu\text{M}$   $F_n$ , 0.4  $\mu\text{M}$  G, 0.2  $\mu\text{M}$  HIJK, 600  $\mu\text{L}$ ). The sample was irradiated by UV light (365 nm, 5 W) for 10 min and the measurement was taken for 1 hour at 55°C.

The calibration curve was derived from the measurements of the samples, containing H/Cy5-I (0.2  $\mu\text{M}$ ), with different concentrations of strand J/BHQ2-K (0, 0.04, 0.08, 0.12, 0.16 and 0.2  $\mu\text{M}$ ) to calculate the transient concentrations of structures HIJK and H/Cy5-I in the samples.

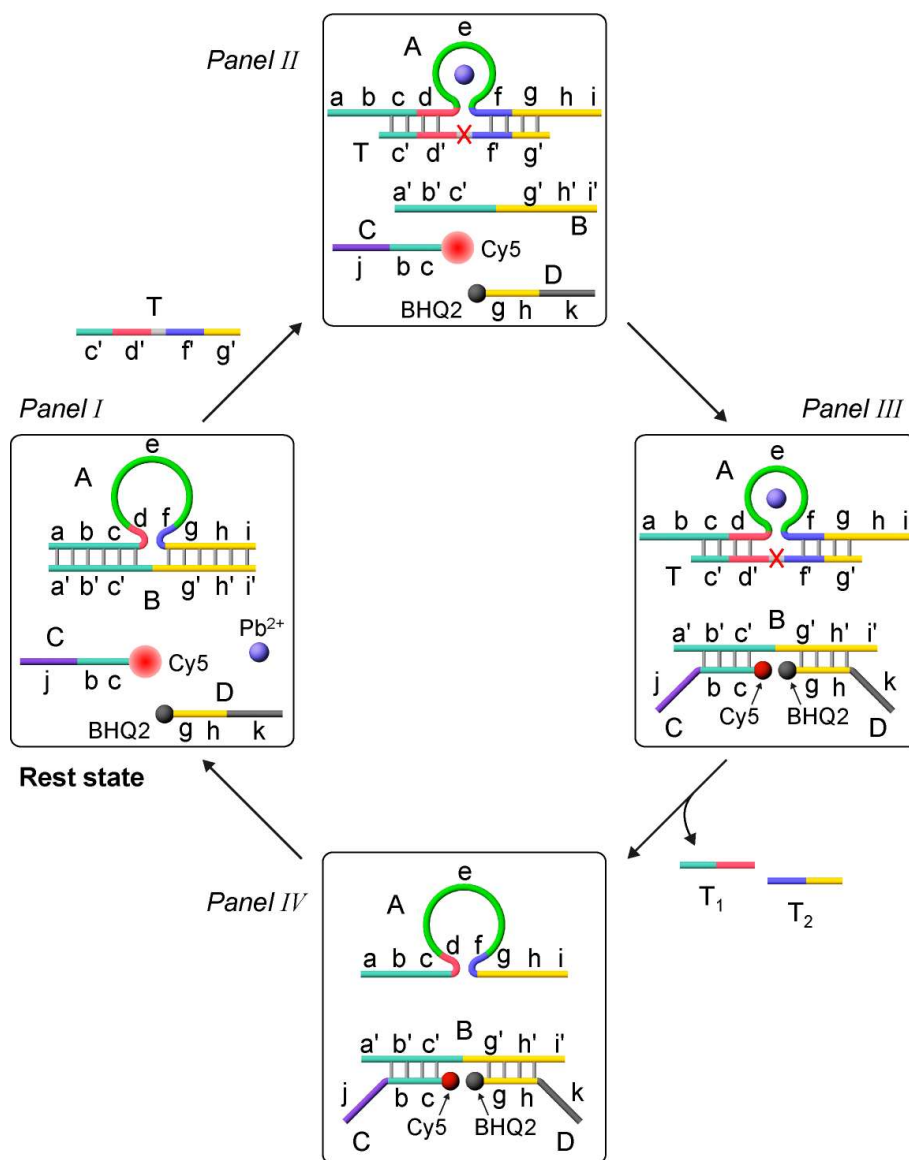

**Figure S1. Schematic stepwise operation of the  $Pb^{2+}$ -ion-dependent DNzyme-driven dissipative network. The parent state of the system, Panel I, includes the A/B duplex scaffold as constituent, the Cy5-C and BHQ2-D strands and  $Pb^{2+}$  ions. Subjecting the system to the fuel-trigger T results in the displacement of strand B, and the formation of the duplex A/T where the loop domain of A binds the  $Pb^{2+}$  ions, and the ribonucleobase-containing strand T acts as substrate of the resulting supramolecular  $Pb^{2+}$ -ion-dependent DNzyme, Panel II. The strand B binds, through hybridization, with the strands Cy5-C and BHQ2-D and forms the intermediate product B/Cy5-C+BHQ2-D and the biocatalytic structure A/T, Panel III. The strand T is being cleaved resulting in the “waste” products  $T_1+T_2$  and the released strand A, Panel IV. The displacement of the strand B from the network product B/Cy5-C+BHQ2-D by A recovers the parent system, Panel I. The dissipative process is followed by the transient time-dependent fluorescence changes generated by the B/Cy5-C+BHQ2-D module.**

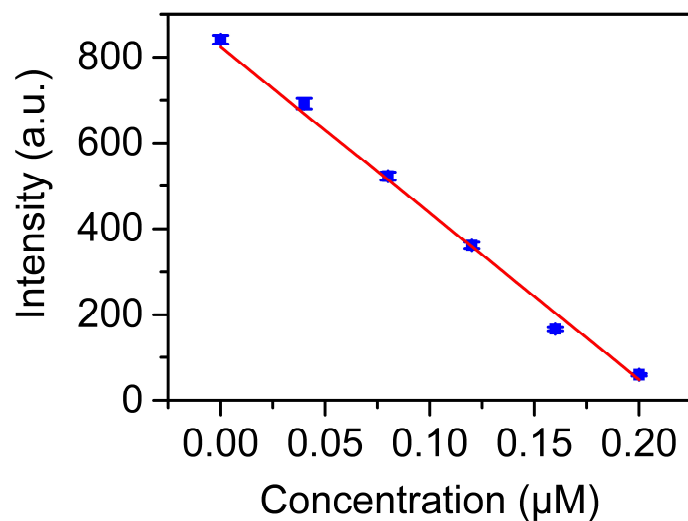

**Figure S2. Calibration curve corresponding to the fluorescence intensities of a mixture of Cy5-C and BHQ2-D (each 0.2  $\mu\text{M}$ ) in the presence of variable concentrations of the strand B. The curve is fit linearly and the  $r^2 = 0.98826$ . The calibration curve provides a quantitative relation between the fluorescence intensity of the B/Cy5-C+BHQ2-D module and its molar concentration. The calibration curve provides a means to translate the fluorescence changes of the dissipative system into quantitative transient concentration changes of the reaction products B/Cy5-C+BHQ2-D along the dissipative transient operation of the system.**

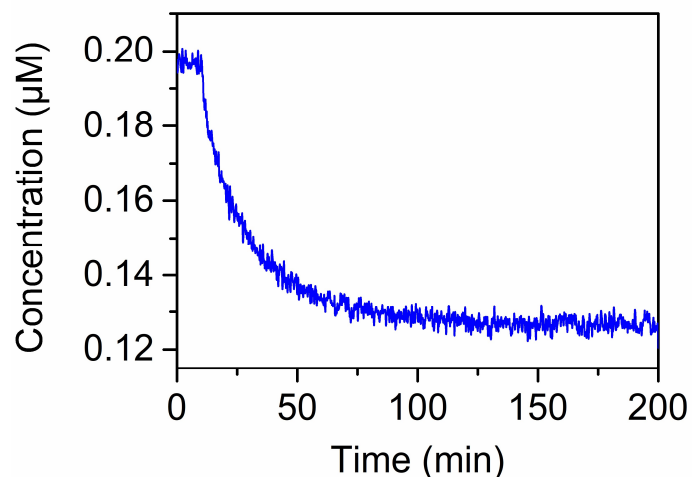

**Figure S3. Control experiment where the A/B duplex and the strands Cy5-C and BHQ2-D are subjected to a modified trigger  $T_c$ , where the ribonucleobase in the substrate strand T is substituted by a DNA base. Under these conditions, the A/B scaffold is displaced by  $T_c$ , to yield the  $Pb^{2+}$ -ion-functionalized complex A/ $T_c$  and the product B/Cy5-C+BHQ2-D. Nonetheless, the A/ $T_c$  complex is catalytically inactive, resulting in only the depletion of the fluorescence of the system as a result of the formation of the B/Cy5-C+BHQ2-D, as shown in Fig. S3, but the dissipative recovery of the system is blocked, due to the formation of a catalytically inactive A/ $T_c$  DNAzyme. The result demonstrates that the formation of the  $Pb^{2+}$ -ion-dependent DNAzyme structure A/T is essential to drive the dissipative networks.**

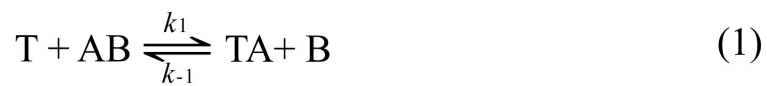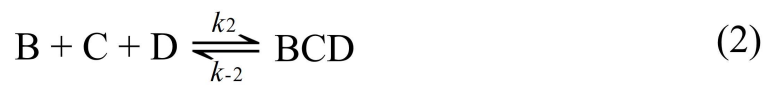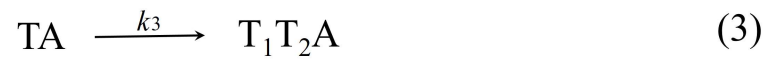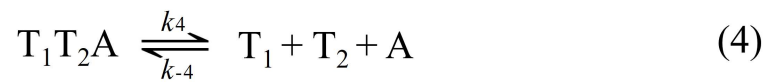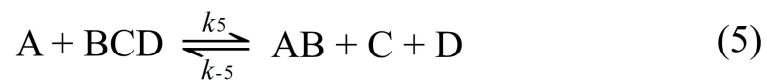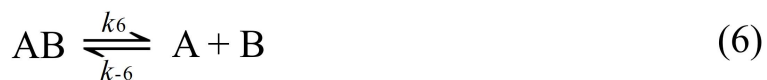

**Figure S4. Kinetic equations corresponding to the Pb<sup>2+</sup>-ion-dependent DNase-driven dissipative system shown in Fig. 1. The dissipative progress is followed by probing the fluorescence changes associated with B/Cy5-C+BHQ2-D.**



$$\begin{aligned}
\frac{dT}{dt} &= -k_1[T][AB] + k_{-1}[TA][B] \\
\frac{dAB}{dt} &= -k_1[T][AB] + k_{-1}[TA][B] + k_5[A][BCD] - k_{-5}[AB][C][D] - k_6[AB] + k_{-6}[A][B] \\
\frac{dTA}{dt} &= k_1[T][AB] - k_{-1}[TA][B] - k_3[TA] \\
\frac{dB}{dt} &= k_1[T][AB] - k_{-1}[TA][B] - k_2[B][C][D] + k_{-2}[BCD] + k_6[AB] - k_{-6}[A][B] \\
\frac{dC}{dt} &= -k_2[B][C][D] + k_{-2}[BCD] + k_5[A][BCD] - k_{-5}[AB][C][D] \\
\frac{dD}{dt} &= -k_2[B][C][D] + k_{-2}[BCD] + k_5[A][BCD] - k_{-5}[AB][C][D] \\
\frac{dBCD}{dt} &= k_2[B][C][D] - k_{-2}[BCD] - k_5[A][BCD] + k_{-5}[AB][C][D] \\
\frac{dT_1T_2A}{dt} &= k_3[TA] - k_4[T_1T_2A] + k_{-4}[T_1][T_2][A] \\
\frac{dT_1}{dt} &= k_4[T_1T_2A] - k_{-4}[T_1][T_2][A] \\
\frac{dT_2}{dt} &= k_4[T_1T_2A] - k_{-4}[T_1][T_2][A] \\
\frac{dA}{dt} &= k_4[T_1T_2A] - k_{-4}[T_1][T_2][A] - k_5[A][BCD] + k_{-5}[AB][C][D] + k_6[AB] - k_{-6}[A][B]
\end{aligned}$$

**Figure S5.** Set of differential rate equations formulated to follow the kinetic model formulated in Fig. S4. This set of rate equations was applied to computationally simulate the contents of the B/Cy5-C+BHQ2-D module using the Matlab R2020a software to reach the best fit to the experimental results by non-linear least square optimization. The resulting computationally simulated rate constants of the best fit curves are summarized in Table S1.

**Table S1. Computationally simulated rate constants for the Pb<sup>2+</sup>-ion-dependent DNAzyme-driven networks shown in Fig. 1.**

|          |                                           |          |                                           |          |                                          |
|----------|-------------------------------------------|----------|-------------------------------------------|----------|------------------------------------------|
| $k_1$    | $0.942 \mu\text{M}^{-1} \text{min}^{-1}$  | $k_3$    | $0.909 \text{min}^{-1}$                   | $k_{-5}$ | $0.006 \mu\text{M}^{-2} \text{min}^{-1}$ |
| $k_{-1}$ | $83.522 \mu\text{M}^{-1} \text{min}^{-1}$ | $k_4$    | $96.832 \text{min}^{-1}$                  | $k_6$    | $0.02145 \text{min}^{-1}$                |
| $k_2$    | $10.28 \mu\text{M}^{-2} \text{min}^{-1}$  | $k_{-4}$ | $44.409 \mu\text{M}^{-2} \text{min}^{-1}$ | $k_{-6}$ | $98.9 \mu\text{M}^{-1} \text{min}^{-1}$  |
| $k_{-2}$ | $0.0067 \text{min}^{-1}$                  | $k_5$    | $2.31 \mu\text{M}^{-1} \text{min}^{-1}$   |          |                                          |

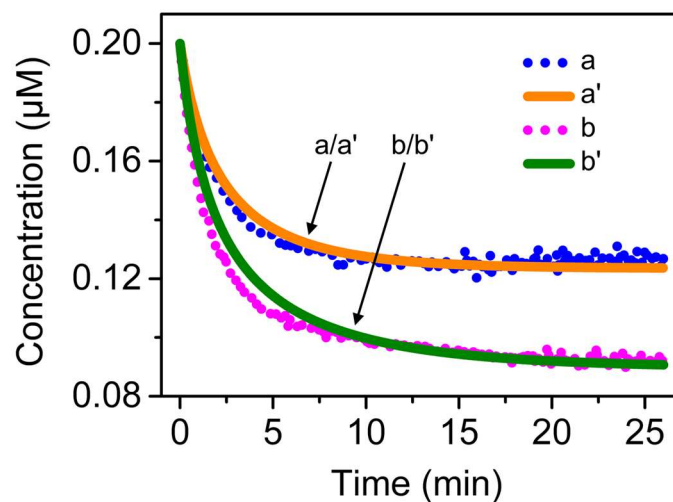

**Figure S6. Experimental validation of the  $k_2/k_{-2}$  rate constants evaluated by the computational simulations. In this experiment constant concentrations of B, 0.2  $\mu\text{M}$ , and Cy5-C, 0.2  $\mu\text{M}$ , were subjected to two different concentrations of BHQ2-D, 0.08  $\mu\text{M}$ , curve (a) and 0.12  $\mu\text{M}$ , curve (b). The transient fluorescence changes of the Cy5 fluorophore as a result of the formation of the B/Cy5-C+BHQ2-D were followed. The two transients were kinetically modelled by the Matlab R2020a software and the values  $k_2/k_{-2}$  for the two curves were derived to be 10.42  $\mu\text{M}^{-2} \text{min}^{-1}$  and 0.0068  $\text{min}^{-1}$  that fits well with the computational simulation of the entire network, thus supporting the overall simulation of the dissipative system.**

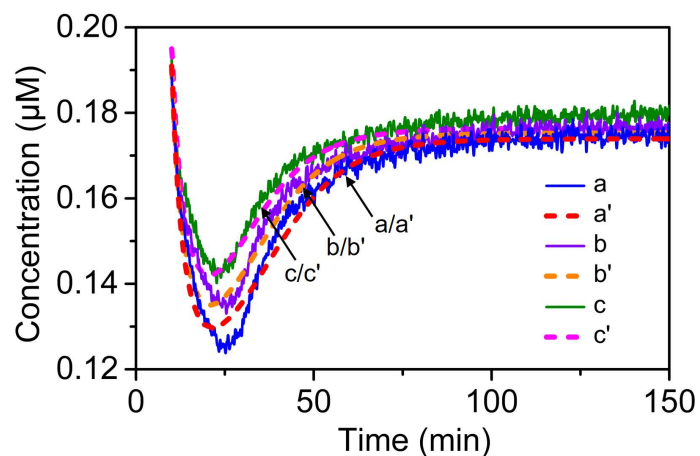

**Figure S7.** Dissipative transient curves for the separated  $\text{Pb}^{2+}$ -ion-dependent DNAzyme-driven network consisting of the A/B duplex,  $0.2 \mu\text{M}$ ,  $\text{Pb}^{2+}$  ions,  $100 \text{ nM}$ , the Cy3-E strand,  $0.2 \mu\text{M}$ , and BHQ2-D strand,  $0.2 \mu\text{M}$ . The dissipative transients (solid lines) are driven upon subjecting the network to the trigger T: (a)  $1 \mu\text{M}$ , (b)  $0.8 \mu\text{M}$ , (c)  $0.6 \mu\text{M}$ . The dashed curves correspond to the computationally simulated results following the kinetic model shown in Fig. S9 and the set of differential rate equations formulated in Fig. S10.

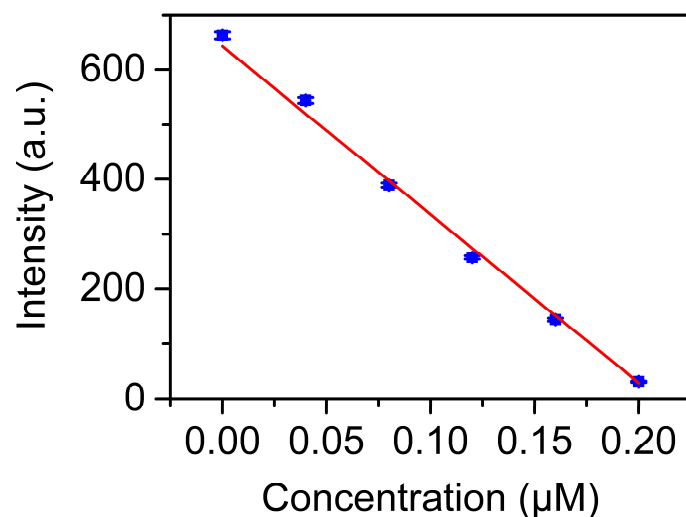

**Figure S8.** Calibration curve corresponding to the fluorescence intensities of a mixture of Cy3-E and BHQ2-D (each 0.2  $\mu\text{M}$ ) in the presence of variable concentrations of the strand B. The curve is fit linearly and the  $r^2 = 0.99641$ . The calibration curve provides a quantitative relation between the fluorescence intensity of the B/Cy3-E+BHQ2-D module and its molar concentration. The calibration curve provides a means to translate the fluorescence changes of the dissipative system into quantitative transient concentration changes of the reaction product B/Cy3-E+BHQ2-D along the dissipative transient operation of the system.

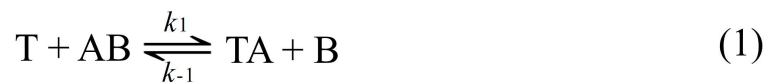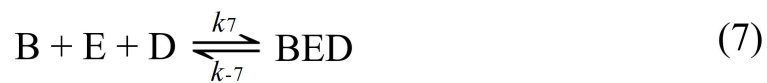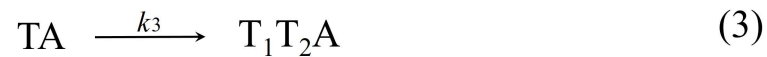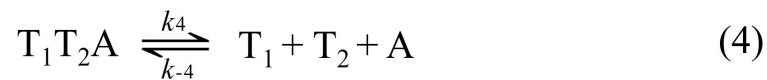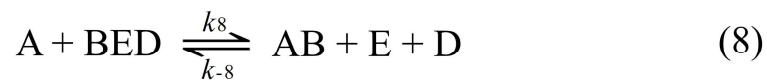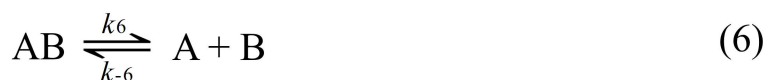

**Figure S9. Kinetic equations corresponding to the Pb<sup>2+</sup>-ion-dependent DNase-driven dissipative system. The dissipative progress is followed by probing the fluorescence changes associated with B/Cy3-E+BHQ2-D.**

$$\begin{aligned}
\frac{dT}{dt} &= -k_1[T][AB] + k_{-1}[TA][B] \\
\frac{dAB}{dt} &= -k_1[T][AB] + k_{-1}[TA][B] + k_8[A][BED] - k_{-8}[AB][E][D] - k_6[AB] + k_{-6}[A][B] \\
\frac{dT_A}{dt} &= k_1[T][AB] - k_{-1}[TA][B] - k_3[TA] \\
\frac{dB}{dt} &= k_1[T][AB] - k_{-1}[TA][B] - k_7[B][E][D] + k_{-7}[BED] + k_6[AB] - k_{-6}[A][B] \\
\frac{dE}{dt} &= -k_7[B][E][D] + k_{-7}[BED] + k_8[A][BED] - k_{-8}[AB][E][D] \\
\frac{dD}{dt} &= -k_7[B][E][D] + k_{-7}[BED] + k_8[A][BED] - k_{-8}[AB][E][D] \\
\frac{dBED}{dt} &= k_7[B][E][D] - k_{-7}[BED] - k_8[A][BED] + k_{-8}[AB][E][D] \\
\frac{dT_1 T_2 A}{dt} &= k_3[TA] - k_4[T_1 T_2 A] + k_{-4}[T_1][T_2][A] \\
\frac{dT_1}{dt} &= k_4[T_1 T_2 A] - k_{-4}[T_1][T_2][A] \\
\frac{dT_2}{dt} &= k_4[T_1 T_2 A] - k_{-4}[T_1][T_2][A] \\
\frac{dA}{dt} &= k_4[T_1 T_2 A] - k_{-4}[T_1][T_2][A] - k_8[A][BED] + k_{-8}[AB][E][D] + k_6[AB] - k_{-6}[A][B]
\end{aligned}$$

**Figure S10.** Set of differential rate equations formulated to follow the kinetic model formulated in Fig. S9. This set of rate equations was applied to computationally simulate the contents of the B/Cy3-E+BHQ2-D module using the Matlab R2020a software to reach the best fit to the experimental results by non-linear least square optimization. The resulting computationally simulated rate constants of the best fit curves are summarized in Table S2.

**Table S2. Computationally simulated rate constants for the Pb<sup>2+</sup>-ion-dependent DNzyme-driven networks shown in Fig. S7.**

|          |                                           |          |                                           |          |                                           |
|----------|-------------------------------------------|----------|-------------------------------------------|----------|-------------------------------------------|
| $k_1$    | $0.942 \mu\text{M}^{-1} \text{min}^{-1}$  | $k_{-4}$ | $44.409 \mu\text{M}^{-2} \text{min}^{-1}$ | $k_{-7}$ | $0.0055 \text{min}^{-1}$                  |
| $k_{-1}$ | $83.522 \mu\text{M}^{-1} \text{min}^{-1}$ | $k_6$    | $0.02145 \text{min}^{-1}$                 | $k_8$    | $1.798 \mu\text{M}^{-1} \text{min}^{-1}$  |
| $k_3$    | $0.909 \text{min}^{-1}$                   | $k_{-6}$ | $98.9 \mu\text{M}^{-1} \text{min}^{-1}$   | $k_{-8}$ | $0.0061 \mu\text{M}^{-2} \text{min}^{-1}$ |
| $k_4$    | $96.832 \text{min}^{-1}$                  | $k_7$    | $10.5 \mu\text{M}^{-2} \text{min}^{-1}$   |          |                                           |



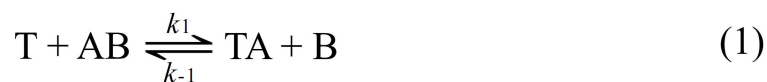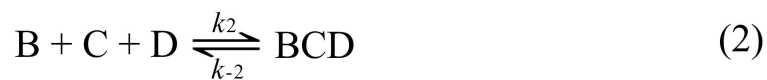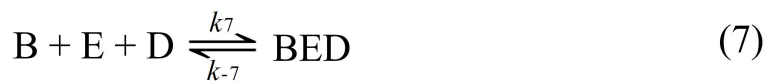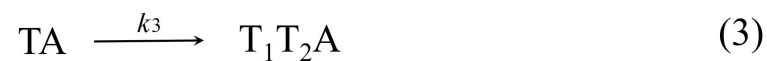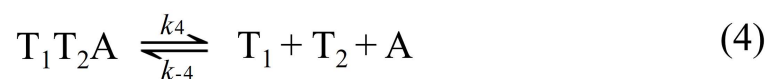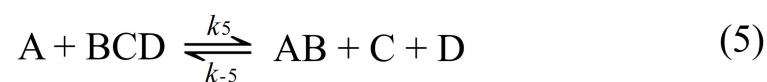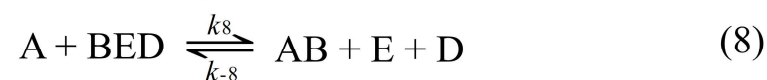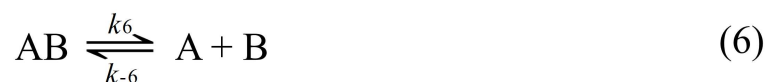

**Figure S11. Kinetic equations corresponding to the Pb<sup>2+</sup>-ion-dependent DNzyme-driven competitive dissipative process consisting of the networks shown in Fig. 3, Panel I and II. The dissipative transients are recorded by probing the fluorescence changes of the B/Cy5-C+BHQ2-D and B/Cy3-E+BHQ2-D products.**

$$\begin{aligned}
\frac{dT}{dt} &= -k_1[T][AB] + k_{-1}[TA][B] \\
\frac{dAB}{dt} &= -k_1[T][AB] + k_{-1}[TA][B] + k_3[A][BCD] - k_{-3}[AB][C][D] + k_8[A][BED] - k_{-8}[AB][E][D] - k_6[AB] + k_{-6}[A][B] \\
\frac{dTA}{dt} &= k_1[T][AB] - k_{-1}[TA][B] - k_3[TA] \\
\frac{dB}{dt} &= k_1[T][AB] - k_{-1}[TA][B] - k_2[B][C][D] + k_{-2}[BCD] - k_7[B][E][D] + k_{-7}[BED] + k_6[AB] - k_{-6}[A][B] \\
\frac{dC}{dt} &= -k_2[B][C][D] + k_{-2}[BCD] + k_3[A][BCD] - k_{-3}[AB][C][D] \\
\frac{dD}{dt} &= -k_2[B][C][D] + k_{-2}[BCD] - k_7[B][E][D] + k_{-7}[BED] + k_3[A][BCD] - k_{-3}[AB][C][D] + k_8[A][BED] - k_{-8}[AB][E][D] \\
\frac{dE}{dt} &= -k_7[B][E][D] + k_{-7}[BED] + k_8[A][BED] - k_{-8}[AB][E][D] \\
\frac{dBCD}{dt} &= k_2[B][C][D] - k_{-2}[BCD] - k_3[A][BCD] + k_{-3}[AB][C][D] \\
\frac{dBED}{dt} &= k_7[B][E][D] - k_{-7}[BED] - k_8[A][BED] + k_{-8}[AB][E][D] \\
\frac{dT_1 T_2 A}{dt} &= k_4[TA] - k_4[T_1 T_2 A] + k_{-4}[T_1][T_2][A] \\
\frac{dT_1}{dt} &= k_4[T_1 T_2 A] - k_{-4}[T_1][T_2][A] \\
\frac{dT_2}{dt} &= k_4[T_1 T_2 A] - k_{-4}[T_1][T_2][A] \\
\frac{dA}{dt} &= k_1[T_1 T_2 A] - k_{-4}[T_1][T_2][A] - k_3[A][BCD] + k_{-3}[AB][C][D] - k_8[A][BED] + k_{-8}[AB][E][D] + k_6[AB] - k_{-6}[A][B]
\end{aligned}$$

**Figure S12.** Set of differential rate equations formulated to follow the kinetic model shown in Fig. S11, corresponding to dissipative system consisting of two competitive networks, Cf. Fig. 3, Panel I and II.

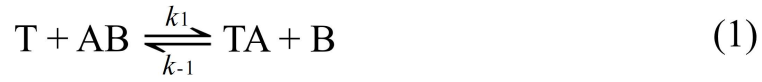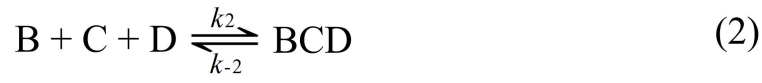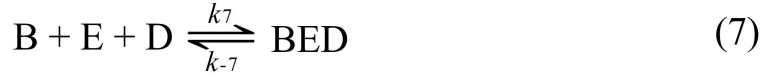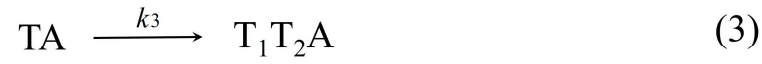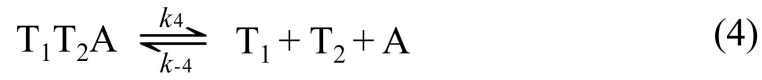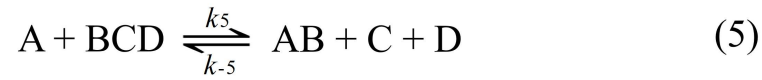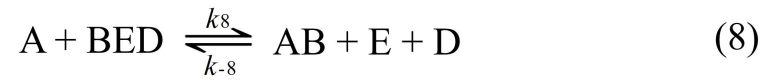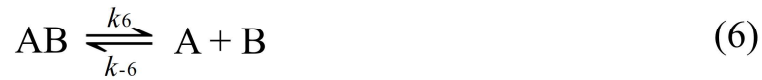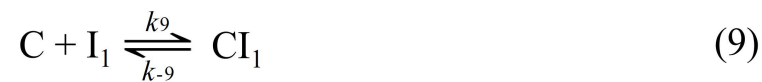

**Figure S13. Kinetic equations corresponding to the  $Pb^{2+}$ -ion-dependent DNAzyme-driven the gated dissipative system in the presence of inhibitor  $I_1$ , Cf. Fig. 3, Panel III and IV.**

$$\begin{aligned}
\frac{dT}{dt} &= -k_1[T][AB] + k_{-1}[TA][B] \\
\frac{dAB}{dt} &= -k_1[T][AB] + k_{-1}[TA][B] + k_5[A][BCD] - k_{-5}[AB][C][D] + k_8[A][BED] - k_{-8}[AB][E][D] - k_6[AB] + k_{-6}[A][B] \\
\frac{dTA}{dt} &= k_1[T][AB] - k_{-1}[TA][B] - k_3[TA] \\
\frac{dB}{dt} &= k_1[T][AB] - k_{-1}[TA][B] - k_2[B][C][D] + k_{-2}[BCD] - k_7[B][E][D] + k_{-7}[BED] + k_6[AB] - k_{-6}[A][B] \\
\frac{dC}{dt} &= -k_2[B][C][D] + k_{-2}[BCD] + k_5[A][BCD] - k_{-5}[AB][C][D] - k_9[C][I_1] + k_{-9}[CI_1] \\
\frac{dD}{dt} &= -k_2[B][C][D] + k_{-2}[BCD] - k_7[B][E][D] + k_{-7}[BED] + k_5[A][BCD] - k_{-5}[AB][C][D] + k_8[A][BED] - k_{-8}[AB][E][D] \\
\frac{dE}{dt} &= -k_7[B][E][D] + k_{-7}[BED] + k_8[A][BED] - k_{-8}[AB][E][D] \\
\frac{dB CD}{dt} &= k_2[B][C][D] - k_{-2}[BCD] - k_5[A][BCD] + k_{-5}[AB][C][D] \\
\frac{dB ED}{dt} &= k_7[B][E][D] - k_{-7}[BED] - k_8[A][BED] + k_{-8}[AB][E][D] \\
\frac{dT_1 T_2 A}{dt} &= k_3[TA] - k_4[T_1 T_2 A] + k_{-4}[T_1][T_2][A] \\
\frac{dT_1}{dt} &= k_4[T_1 T_2 A] - k_{-4}[T_1][T_2][A] \\
\frac{dT_2}{dt} &= k_4[T_1 T_2 A] - k_{-4}[T_1][T_2][A] \\
\frac{dA}{dt} &= k_4[T_1 T_2 A] - k_{-4}[T_1][T_2][A] - k_5[A][BCD] + k_{-5}[AB][C][D] - k_8[A][BED] + k_{-8}[AB][E][D] + k_6[AB] - k_{-6}[A][B] \\
\frac{dI_1}{dt} &= -k_9[C][I_1] + k_{-9}[CI_1] \\
\frac{dCI_1}{dt} &= k_9[C][I_1] - k_{-9}[CI_1]
\end{aligned}$$

**Figure S14.** Set of differential rate equations formulated to follow the kinetic model formulated in Fig. S13. This set of rate equations was applied to computationally simulate the contents of the B/Cy5-C+BHQ2-D and B/Cy3-E+BHQ2-D modules in the presence of the inhibitor I<sub>1</sub> using the Matlab R2020a software to reach the best fit to the experimental results by non-linear least square optimization. The resulting computationally simulated rate constants of the best fit curves are summarized in Table S3.

**Table S3. Computationally simulated rate constants for the gated Pb<sup>2+</sup>-ion-dependent DNzyme-driven networks in the presence of the inhibitor I<sub>1</sub>.**

|          |                                           |          |                                           |          |                                           |
|----------|-------------------------------------------|----------|-------------------------------------------|----------|-------------------------------------------|
| $k_1$    | $0.942 \mu\text{M}^{-1} \text{min}^{-1}$  | $k_{-4}$ | $44.409 \mu\text{M}^{-2} \text{min}^{-1}$ | $k_{-7}$ | $0.0055 \text{min}^{-1}$                  |
| $k_{-1}$ | $83.522 \mu\text{M}^{-1} \text{min}^{-1}$ | $k_5$    | $2.31 \mu\text{M}^{-1} \text{min}^{-1}$   | $k_8$    | $1.798 \mu\text{M}^{-1} \text{min}^{-1}$  |
| $k_2$    | $10.28 \mu\text{M}^{-2} \text{min}^{-1}$  | $k_{-5}$ | $0.006 \mu\text{M}^{-2} \text{min}^{-1}$  | $k_{-8}$ | $0.0061 \mu\text{M}^{-2} \text{min}^{-1}$ |
| $k_{-2}$ | $0.0067 \text{min}^{-1}$                  | $k_6$    | $0.02145 \text{min}^{-1}$                 | $k_9$    | $93.5 \mu\text{M}^{-1} \text{min}^{-1}$   |
| $k_3$    | $0.909 \text{min}^{-1}$                   | $k_{-6}$ | $98.9 \mu\text{M}^{-1} \text{min}^{-1}$   | $k_{-9}$ | $0.0032 \text{min}^{-1}$                  |
| $k_4$    | $96.832 \text{min}^{-1}$                  | $k_7$    | $10.5 \mu\text{M}^{-2} \text{min}^{-1}$   |          |                                           |

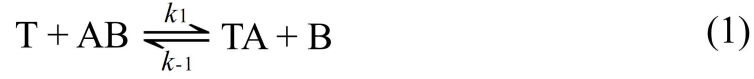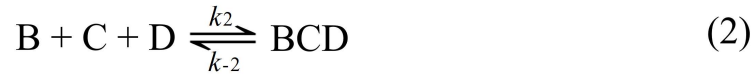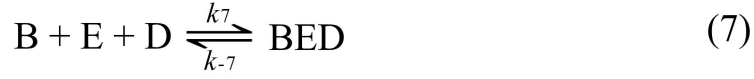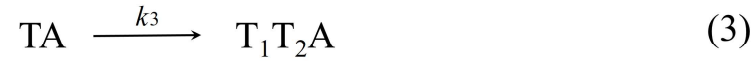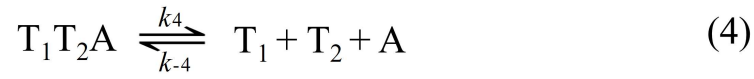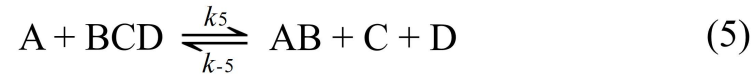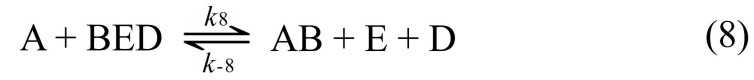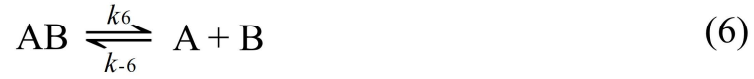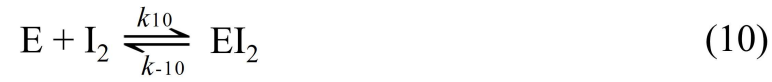

**Figure S15. Kinetic equations corresponding to the  $Pb^{2+}$ -ion-dependent DNzyme-driven the gated dissipative system in the presence of inhibitor  $I_2$ , Cf. Fig. 3, Panel V and VI.**

$$\begin{aligned}
\frac{dT}{dt} &= -k_1[T][AB] + k_{-1}[TA][B] \\
\frac{dAB}{dt} &= -k_1[T][AB] + k_{-1}[TA][B] + k_3[A][BCD] - k_{-3}[AB][C][D] + k_8[A][BED] - k_{-8}[AB][E][D] - k_6[AB] + k_{-6}[A][B] \\
\frac{dT_A}{dt} &= k_1[T][AB] - k_{-1}[TA][B] - k_3[TA] \\
\frac{dB}{dt} &= k_1[T][AB] - k_{-1}[TA][B] - k_2[B][C][D] + k_{-2}[BCD] - k_7[B][E][D] + k_{-7}[BED] + k_6[AB] - k_{-6}[A][B] \\
\frac{dC}{dt} &= -k_2[B][C][D] + k_{-2}[BCD] + k_3[A][BCD] - k_{-3}[AB][C][D] \\
\frac{dD}{dt} &= -k_2[B][C][D] + k_{-2}[BCD] - k_7[B][E][D] + k_{-7}[BED] + k_3[A][BCD] - k_{-3}[AB][C][D] + k_8[A][BED] - k_{-8}[AB][E][D] \\
\frac{dE}{dt} &= -k_7[B][E][D] + k_{-7}[BED] + k_8[A][BED] - k_{-8}[AB][E][D] - k_{10}[E][I_2] + k_{-10}[EI_2] \\
\frac{dBCD}{dt} &= k_2[B][C][D] - k_{-2}[BCD] - k_3[A][BCD] + k_{-3}[AB][C][D] \\
\frac{dBED}{dt} &= k_7[B][E][D] - k_{-7}[BED] - k_8[A][BED] + k_{-8}[AB][E][D] \\
\frac{dT_1T_2A}{dt} &= k_4[TA] - k_4[T_1T_2A] + k_{-4}[T_1][T_2][A] \\
\frac{dT_1}{dt} &= k_4[T_1T_2A] - k_{-4}[T_1][T_2][A] \\
\frac{dT_2}{dt} &= k_4[T_1T_2A] - k_{-4}[T_1][T_2][A] \\
\frac{dA}{dt} &= k_4[T_1T_2A] - k_{-4}[T_1][T_2][A] - k_3[A][BCD] + k_{-3}[AB][C][D] - k_8[A][BED] + k_{-8}[AB][E][D] + k_6[AB] - k_{-6}[A][B] \\
\frac{dI_2}{dt} &= -k_{10}[E][I_2] + k_{-10}[EI_2] \\
\frac{dEI_2}{dt} &= k_{10}[E][I_2] - k_{-10}[EI_2]
\end{aligned}$$

**Figure S16.** Set of differential rate equations formulated to follow the kinetic model formulated in Fig. S15. This set of rate equations was applied to computationally simulate the contents of the B/Cy5-C+BHQ2-D and B/Cy3-E+BHQ2-D modules in the presence of the inhibitor  $I_2$  using the Matlab R2020a software to reach the best fit to the experimental results by non-linear least square optimization. The resulting computationally simulated rate constants of the best fit curves are summarized in Table S4.

**Table S4. Computationally simulated rate constants for the gated Pb<sup>2+</sup>-ion-dependent DNzyme-driven networks in the presence of the inhibitor I<sub>2</sub>.**

|          |                                           |          |                                           |           |                                           |
|----------|-------------------------------------------|----------|-------------------------------------------|-----------|-------------------------------------------|
| $k_1$    | $0.942 \mu\text{M}^{-1} \text{min}^{-1}$  | $k_{-4}$ | $44.409 \mu\text{M}^{-2} \text{min}^{-1}$ | $k_{-7}$  | $0.0055 \text{min}^{-1}$                  |
| $k_{-1}$ | $83.522 \mu\text{M}^{-1} \text{min}^{-1}$ | $k_5$    | $2.31 \mu\text{M}^{-1} \text{min}^{-1}$   | $k_8$     | $1.798 \mu\text{M}^{-1} \text{min}^{-1}$  |
| $k_2$    | $10.28 \mu\text{M}^{-2} \text{min}^{-1}$  | $k_{-5}$ | $0.006 \mu\text{M}^{-2} \text{min}^{-1}$  | $k_{-8}$  | $0.0061 \mu\text{M}^{-2} \text{min}^{-1}$ |
| $k_{-2}$ | $0.0067 \text{min}^{-1}$                  | $k_6$    | $0.02145 \text{min}^{-1}$                 | $k_{10}$  | $73.5 \mu\text{M}^{-1} \text{min}^{-1}$   |
| $k_3$    | $0.909 \text{min}^{-1}$                   | $k_{-6}$ | $98.9 \mu\text{M}^{-1} \text{min}^{-1}$   | $k_{-10}$ | $0.00256 \text{min}^{-1}$                 |
| $k_4$    | $96.832 \text{min}^{-1}$                  | $k_7$    | $10.5 \mu\text{M}^{-2} \text{min}^{-1}$   |           |                                           |



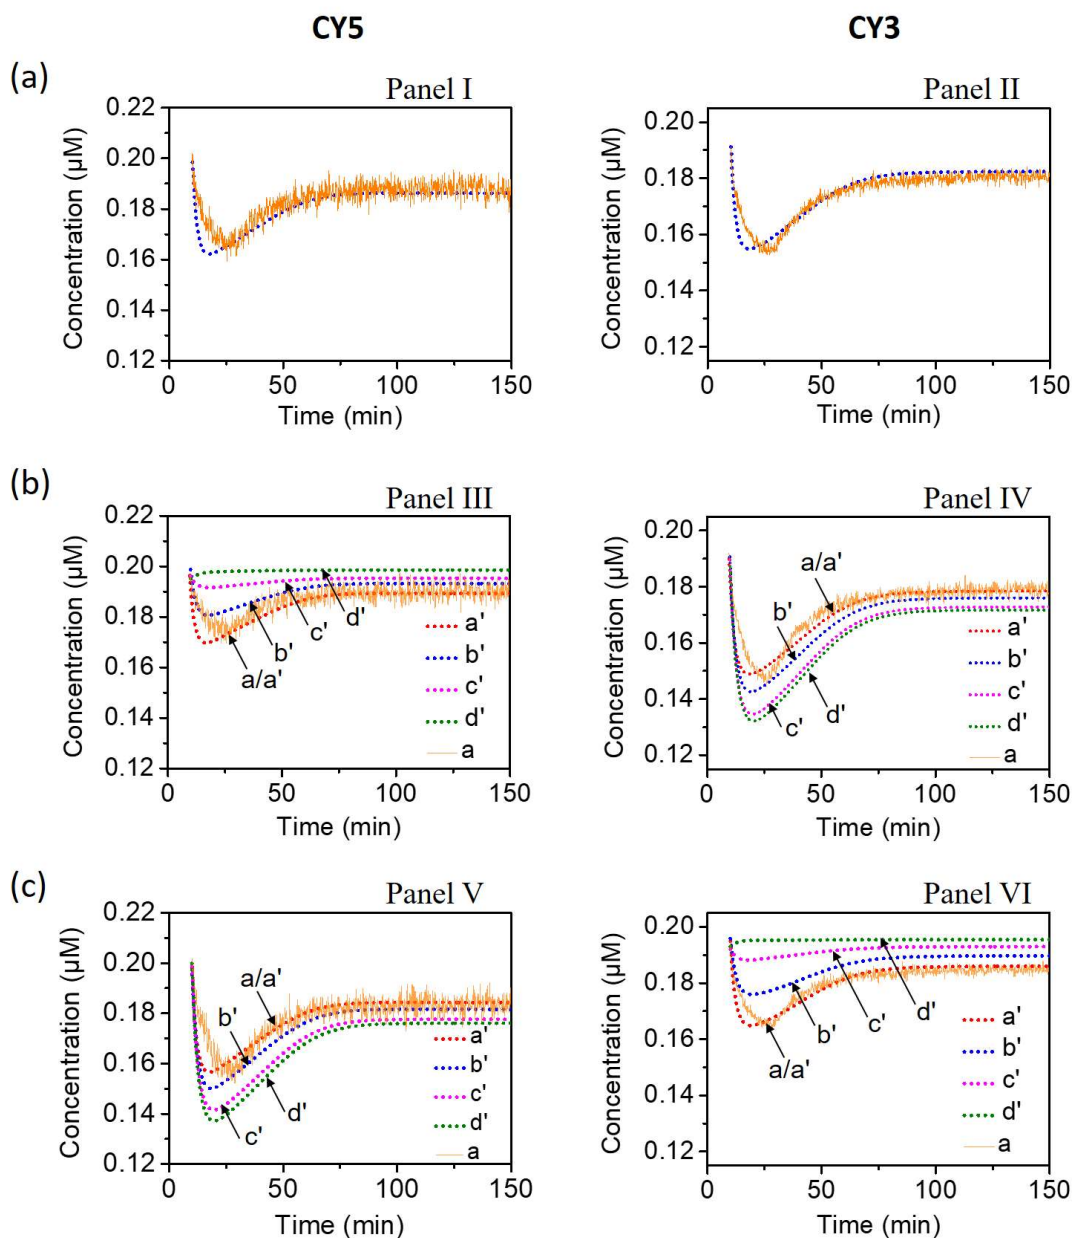

**Figure S17. Computational simulated transients corresponding to the systems shown in Fig. 3 and the respective experimental results shown in Fig. 4. (a) Panel I and II present the computational simulated dissipative transients for the results shown in Fig. 4, Panel I and II. (b) Panel III and IV show the computational simulated transients corresponding to the inhibitor  $I_1$  gated dissipative networks, Gate 1, shown in Fig. 4, Panel III and IV, in the presence of variable concentrations of  $I_1$ : (a/a',  $I_1 = 0.06 \mu\text{M}$ ; b',  $I_1 = 0.12 \mu\text{M}$ ; c',  $I_1 = 0.18 \mu\text{M}$ ; d',  $I_1 = 0.2 \mu\text{M}$ ). (c) Panel V and VI show the computational simulated transients corresponding to the inhibitor  $I_2$  gated dissipative networks, Gate 2, shown in Fig. 4, Panel V and VI, in the presence of variable concentrations of  $I_2$ : (a/a',  $I_2 = 0.06 \mu\text{M}$ ; b',  $I_2 = 0.12 \mu\text{M}$ ; c',  $I_2 = 0.18 \mu\text{M}$ ; d',  $I_2 = 0.2 \mu\text{M}$ ). The solid lines correspond to the experimental results and the dashed lines are the computational simulated data.**

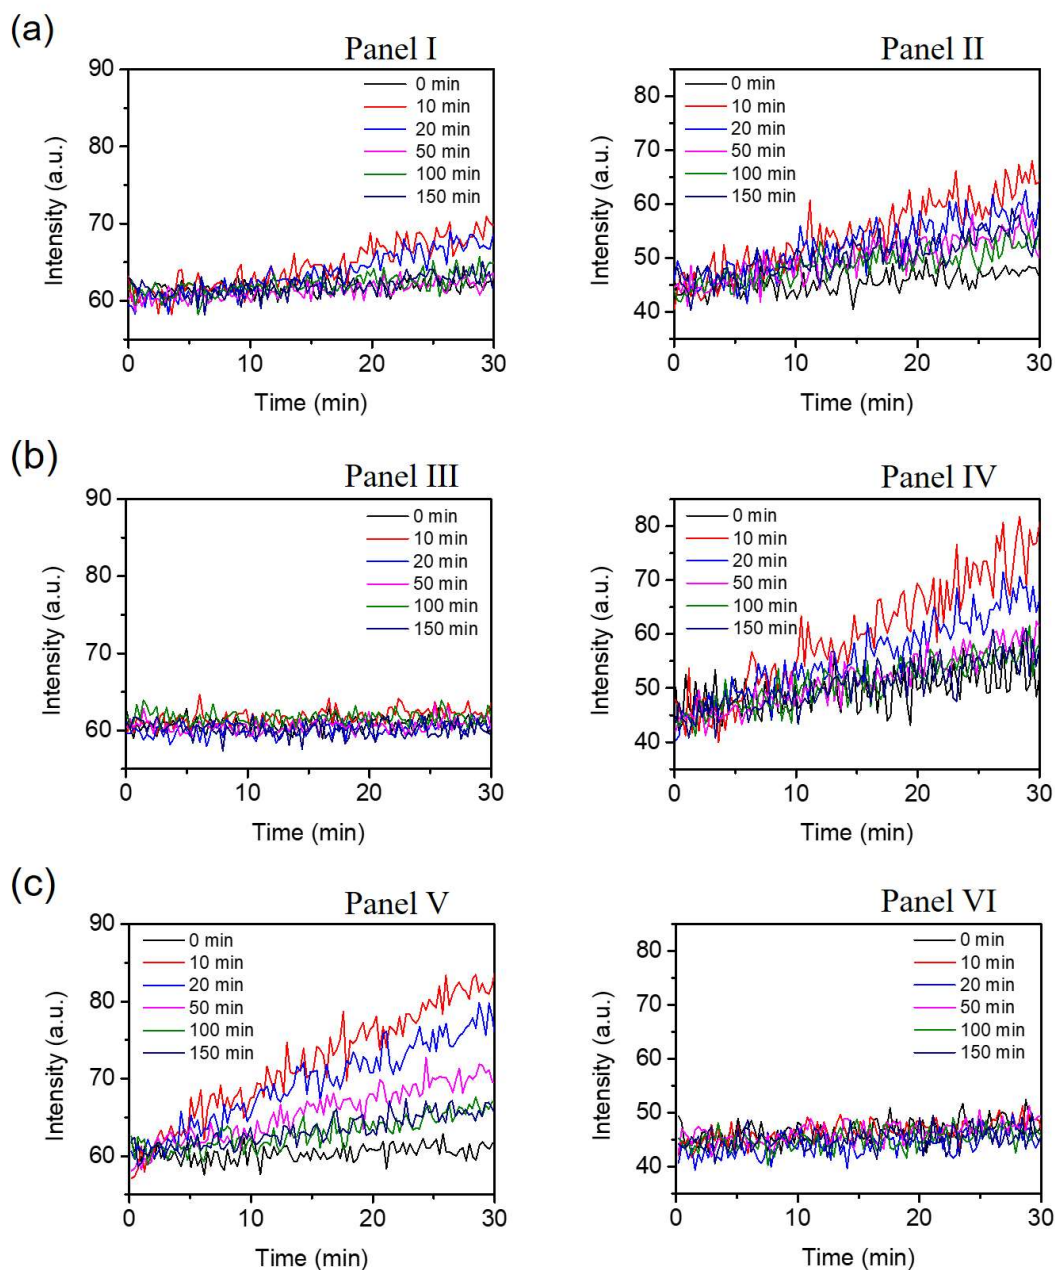

**Figure S18: Rates corresponding to the cleavage of substrate  $S_1$  and substrate  $S_2$  by DNAzyme(1), Panels I and DNAzyme(2), Panels II, at different time of the transient processes corresponding to: (a) state “A” in Figure 6(a), (b) state “B”, gated by  $I_1$ , Figure 6(b), (c) state “C” in Figure 6(c), gated by  $I_2$ .**

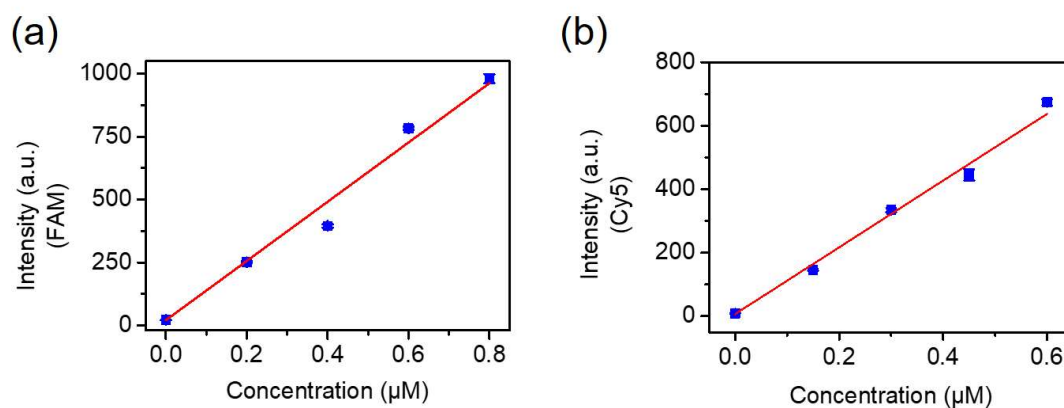

**Figure S19: (a) Calibration curve corresponding to the fluorescence intensities of FAM-modified fragmented M at variable concentrations. The curve is fit linearly and the  $r^2 = 0.98402$ . (b) Calibration curve corresponding to the fluorescence intensities of Cy5-modified fragmented N at variable concentrations. The curve is fit linearly and the  $r^2 = 0.99095$ .**

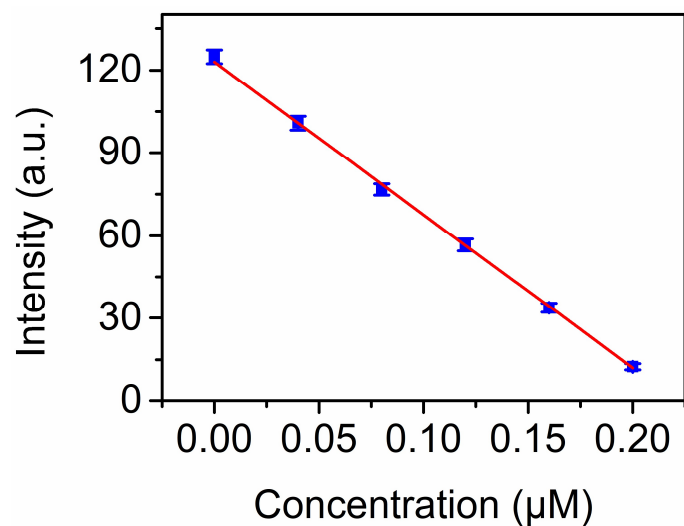

**Figure S20.** Calibration curve corresponding to the concentrations of the constituents H/Cy5-I in the presence of J/BHQ2-K to monitor the light-induced dissipative process shown in Fig. 7. The curve is fit linearly and the  $r^2 = 0.99922$ . The calibration curve is derived by applying a constant concentration of H/Cy5-I, 0.2  $\mu\text{M}$ , and following the fluorescence changes (quenching) by the addition of variable concentrations of J/BHQ2-K.

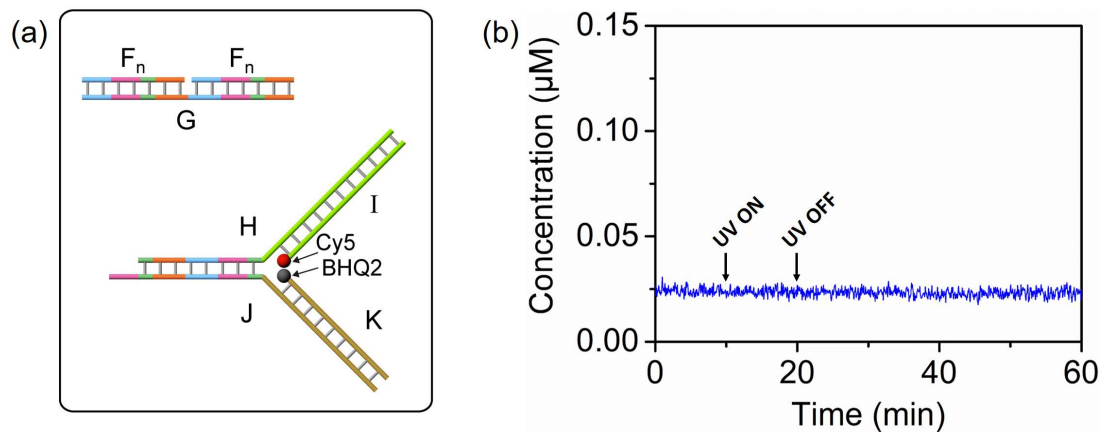

**Figure S21. Control experiment verifying the need of the azobenzene functionalized  $G/(F_i)_2$  duplex to drive the light-induced dissipative system. In this experiment, a duplex lacking the azobenzene functionalities,  $G/(F_n)_2$  duplex is used, Fig. S21 (a). No dissipative process is observed upon UV irradiation of the system, Fig. S21 (b).**

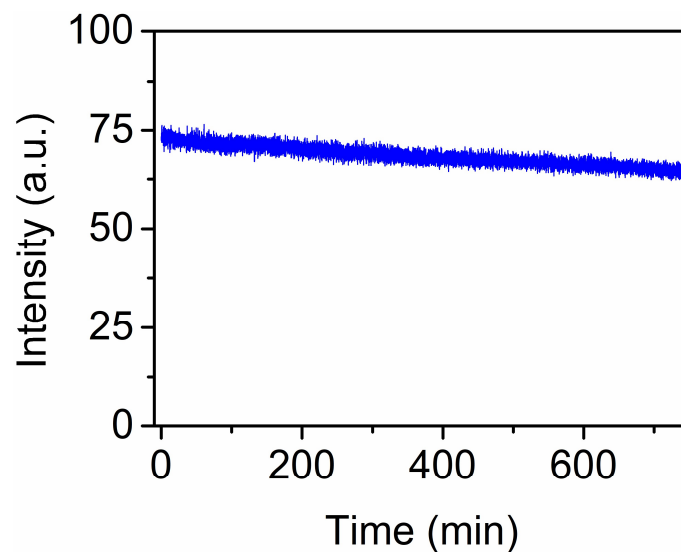

**Figure S22.** Control experiment confirming that the dissipative light-induced process shown in Fig. 7 requires a temperature of 55°C to induce the recovery of the original net. Fig. S22 shows the transient curve generated upon the UV irradiation of system at 55°C to generate the intermediate product H/Cy5-I and G/J/BHQ2-K followed by the immediate cooling of the system to 25°C. Very inefficient dissipative decay of the system is observed.

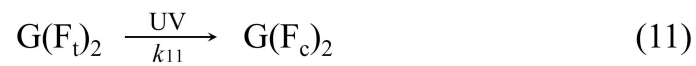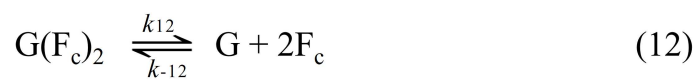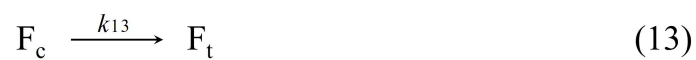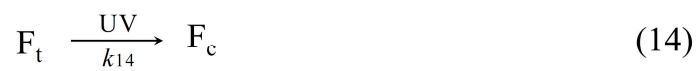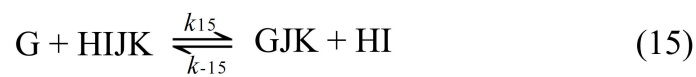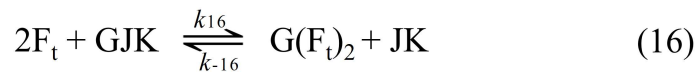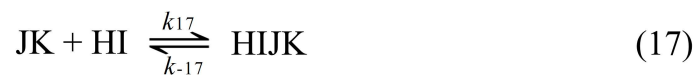

**Figure S23. Kinetic equations corresponding to the UV light-driven dissipative system.**

$$\begin{aligned}
\frac{dG(F_t)_2}{dt} &= -k_{11}[G(F_t)_2] + k_{16}[F_t]^2[GJK] - k_{-16}[G(F_t)_2][JK] \\
\frac{dG(F_c)_2}{dt} &= k_{11}[G(F_t)_2] - k_{12}[G(F_c)_2] + k_{-12}[G][F_c]^2 \\
\frac{dG}{dt} &= k_{12}[G(F_c)_2] - k_{-12}[G][F_c]^2 - k_{15}[G][HIJK] + k_{-15}[GJK][HI] \\
\frac{dF_c}{dt} &= k_{12}[G(F_c)_2] - k_{-12}[G][F_c]^2 - k_{13}[F_c] + k_{14}[F_t] \\
\frac{dF_t}{dt} &= k_{13}[F_c] - k_{14}[F_t] - k_{16}[F_t]^2[GJK] + k_{-16}[G(F_t)_2][JK] \\
\frac{dHIJK}{dt} &= -k_{15}[G][HIJK] + k_{-15}[GJK][HI] + k_{17}[JK][HI] - k_{-17}[HIJK] \\
\frac{dGJK}{dt} &= k_{15}[G][HIJK] - k_{-15}[GJK][HI] - k_{16}[F_t]^2[GJK] + k_{-16}[G(F_t)_2][JK] \\
\frac{dHI}{dt} &= k_{15}[G][HIJK] - k_{-15}[GJK][HI] - k_{17}[JK][HI] + k_{-17}[HIJK] \\
\frac{dJK}{dt} &= k_{16}[F_t]^2[GJK] - k_{-16}[G(F_t)_2][JK] - k_{17}[JK][HI] + k_{-17}[HIJK]
\end{aligned}$$

**Figure S24.** Set of differential rate equations formulated to follow the kinetic model formulated in Fig. S23. This set of rate equations was applied to computationally simulate the contents of the Y-shaped structure module using the Matlab R2020a software to reach the best fit to the experimental results by non-linear least square optimization. The resulting computationally simulated rate constants of the best fit curves are summarized in Table S5.



**Table S5. Rate constants derived from the computational simulation of the UV light-driven dissipative system.**

|           |                                                      |           |                                                       |           |                                                      |
|-----------|------------------------------------------------------|-----------|-------------------------------------------------------|-----------|------------------------------------------------------|
| $k_{11}$  | $0.18052 \text{ min}^{-1}$                           | $k_{14}$  | $17.2777 \text{ min}^{-1}$                            | $k_{-16}$ | $0.32344 \text{ } \mu\text{M}^{-1} \text{ min}^{-1}$ |
| $k_{12}$  | $15.25584 \text{ min}^{-1}$                          | $k_{15}$  | $7.44184 \text{ } \mu\text{M}^{-1} \text{ min}^{-1}$  | $k_{17}$  | $90.1532 \text{ } \mu\text{M}^{-1} \text{ min}^{-1}$ |
| $k_{-12}$ | $0.07168 \text{ } \mu\text{M}^{-2} \text{ min}^{-1}$ | $k_{-15}$ | $5.48606 \text{ } \mu\text{M}^{-1} \text{ min}^{-1}$  | $k_{-17}$ | $0.03002 \text{ min}^{-1}$                           |
| $k_{13}$  | $0.0071 \text{ min}^{-1}$                            | $k_{16}$  | $58.93276 \text{ } \mu\text{M}^{-2} \text{ min}^{-1}$ |           |                                                      |

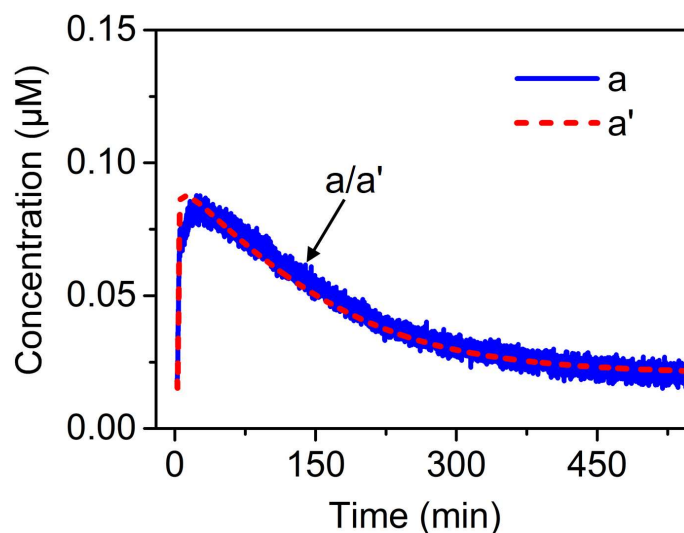

**Figure S25. (a) Light-induced dissipative transient generated upon the illumination of the system shown in Fig. 7 for a time-interval of 5 min (in contrast to the experiment shown in Fig. 8(a) that applied of photoisomerization time-interval of 10 min). Evidently, the concentration of the intermediate products (H/Cy5-I and G/J/BHQ2-K is lower). The curve a' (dashed line) correspond to the computationally simulated fitting of curve a, using the rate constants derived in the primary simulation of the curves shown in Fig. 8(a) and the rate constants provided in Table S5, supporting the versatile fitting procedure (see, also Fig. S26).**

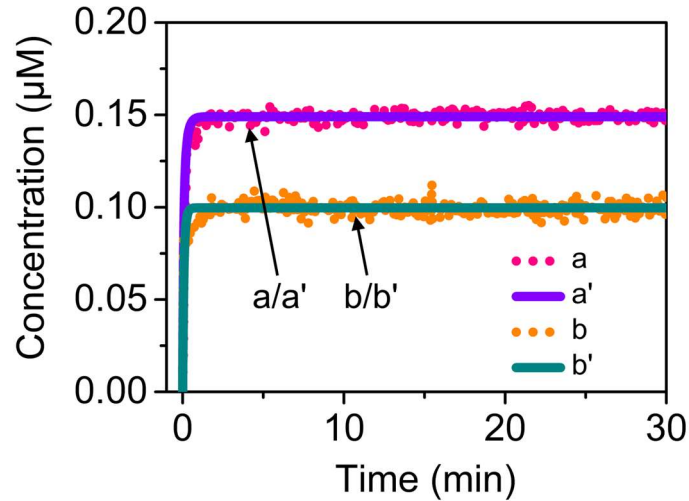

**Figure S26. Experimental validation of the  $k_{17}/k_{-17}$  rate constants evaluated by the computational simulations. In this experiment constant concentrations of H, 0.2  $\mu\text{M}$ , and I, 0.2  $\mu\text{M}$ , were subjected to two different concentrations of J/K, 0.15  $\mu\text{M}$ , curve (a) and 0.1  $\mu\text{M}$ , curve (b). The transient fluorescence changes of the Cy5 fluorophore as a result of the formation of the Y-shaped structure were followed. The two transients were kinetically modelled by the Matlab R2020a software and the values  $k_{17}/k_{-17}$  for the two curves were derived to be 90.452  $\mu\text{M}^{-1} \text{min}^{-1}$  and 0.0301  $\text{min}^{-1}$  that fits well with the computational simulation of the entire network, thus supporting the overall simulation of the dissipative system.**
